# Supplementary material for: MAP2 is differentially phosphorylated in schizophrenia, altering its function
Source: PubMed Central journal article supplement (PMC8325721; doi:10.1038/s41380-021-01034-z), 2021-02-01
Supplement: NIHMS1663867-supplement-2.pdf [file NIHMS1663867-supplement-2.pdf]

**Table S6. Primer sequences**

| <b>TARGET</b>                 | <b>FORWARD (5'-3')</b>                                                                             | <b>REVERSE (5'-3')</b>                                                                             |
|-------------------------------|----------------------------------------------------------------------------------------------------|----------------------------------------------------------------------------------------------------|
| S1782E<br>mutagenesis         | CCACGCTGGATCTGCCTGGTTCCTGT<br>GTAATGATCTCAGCC                                                      | N/A                                                                                                |
| MAP2c<br>sanger<br>sequencing | Primer 1: GCGGTAGGCGTGTACGGT<br>Primer 2: TTCACGCACACCAGGCACT<br>Primer3:<br>TAGACCTAAGCCATGTGACAT | Primer 1: AGCAGTCCCCAAGTCAGT<br>Primer 2: AGTGCCTGGTGTGCGTGAA<br>Primer3:<br>GAGAAGGAGGCAGATTAGCTG |
